# Supplementary material for: Replacement of the phosphodiester backbone between canonical nucleosides with a dirhenium carbonyl “click” linker—a new class of luminescent organometallic dinucleoside phosphate mimics
Source: Royal Society of Chemistry journal article supplement (doi:10.1039/d2dt03995h), 2023-01-01
Supplement: d2dt03995h1.pdf [file d2dt03995h1.pdf]

## SUPPORTING INFORMATION

### **Replacement of the phosphodiester backbone between canonical nucleosides with dirhenium carbonyl “click” linker**

#### **– a new class of luminescent organometallic dinucleoside phosphate mimics**

Joanna Skiba<sup>a</sup>, Aleksandra Kowalczyk<sup>b</sup>, Aleksander Gorski<sup>c</sup>, Natalia Dutkiewicz<sup>c</sup>, Magdalena Gapińska<sup>d</sup>, Józef Strózek<sup>a</sup>,  
Krzysztof Woźniak<sup>e</sup>, Damian Trzybiński<sup>e</sup>, and Konrad Kowalski<sup>a,\*</sup>

<sup>a</sup>*Faculty of Chemistry, Department of Organic Chemistry, University of Łódź, Tamka 12, 91-403 Łódź, Poland*

<sup>b</sup>*Department of Molecular Microbiology, Institute of Microbiology, Biotechnology and Immunology, Faculty of Biology and Environmental Protection, University of Łódź, Banacha 12/16, 90-237 Łódź, Poland*

<sup>c</sup>*Institute of Physical Chemistry, Polish Academy of Sciences, Kasprzaka 44/52, Warsaw, Poland*

<sup>d</sup>*Faculty of Biology and Environmental Protection, Laboratory of Microscopic Imaging and Specialized Biological Techniques, University of Łódź, Banacha 12/16, 90-237 Łódź, Poland*

<sup>e</sup>*Faculty of Chemistry, Biological and Chemical Research Centre, University of Warsaw, Żwirki i Wigury 101, 02-089 Warszawa, Poland*

## Contents

|                                                                                                                       |            |
|-----------------------------------------------------------------------------------------------------------------------|------------|
| <b>Fig. S1</b> <sup>1</sup> H-NMR spectrum of <b>1</b> in DMSO-d <sub>6</sub> (600 MHz)                               | <b>S3</b>  |
| <b>Fig. S2</b> <sup>1</sup> H-NMR spectrum of <b>2</b> in CDCl <sub>3</sub> (600 MHz)                                 | <b>S4</b>  |
| <b>Fig. S3</b> <sup>1</sup> H-NMR spectrum of <b>4</b> in DMSO-d <sub>6</sub> (600 MHz)                               | <b>S5</b>  |
| <b>Fig. S4</b> <sup>1</sup> H-NMR spectrum of <b>5</b> in DMSO-d <sub>6</sub> (600 MHz)                               | <b>S6</b>  |
| <b>Fig. S5</b> <sup>1</sup> H-NMR spectrum of <b>6</b> in DMSO-d <sub>6</sub> (600 MHz)                               | <b>S7</b>  |
| <b>Fig. S6</b> <sup>1</sup> H-NMR spectrum of <b>7</b> in DMSO-d <sub>6</sub> (600 MHz)                               | <b>S8</b>  |
| <b>Fig. S7</b> <sup>1</sup> H-NMR spectrum of <b>8</b> in DMSO-d <sub>6</sub> (600 MHz)                               | <b>S9</b>  |
| <b>Fig. S8</b> <sup>1</sup> H-NMR spectrum of <b>9</b> in DMSO-d <sub>6</sub> (600 MHz)                               | <b>S10</b> |
| <b>Fig. S9</b> <sup>1</sup> H-NMR spectrum of <b>10</b> in DMSO-d <sub>6</sub> (600 MHz)                              | <b>S11</b> |
| <b>Fig. S10</b> <sup>1</sup> H-NMR spectrum of <b>11</b> in DMSO-d <sub>6</sub> (600 MHz)                             | <b>S12</b> |
| <b>Fig. S11</b> Inclination of the planes within the coordination spheres of Re1 and Re2 in <b>2</b> and <b>8</b>     | <b>S13</b> |
| <b>Fig. S12</b> Individual molecules of <b>8</b> held together by the O–H···O hydrogen bonds arranged in R22(8) motif | <b>S14</b> |
| <b>Fig. S13</b> Luminescence of <b>5</b> in air-equilibrated DMSO solution at ambient temperature                     | <b>S15</b> |
| <b>Fig.S14</b> Luminescence of HeLa cells after 30 min incubation with <b>4-6, 10</b> and <b>11</b>                   | <b>S16</b> |
| <b>Table S1</b> Crystal data and structure refinement for investigated compounds                                      | <b>S17</b> |
| <b>Table S2</b> Bond lengths for <b>2</b> [Å]                                                                         | <b>S19</b> |
| <b>Table S3</b> Values of valence angles for <b>2</b> [ °]                                                            | <b>S20</b> |
| <b>Table S4</b> Values of torsion angles for <b>2</b> [ °]                                                            | <b>S21</b> |
| <b>Table S5</b> Bond lengths for <b>8</b> [Å]                                                                         | <b>S22</b> |
| <b>Table S6</b> Values of valence angles for <b>8</b> [ °]                                                            | <b>S23</b> |
| <b>Table S7</b> Values of torsion angles for <b>8</b> [ °]                                                            | <b>S24</b> |
| <b>Details on DFT Calculations</b>                                                                                    | <b>S25</b> |

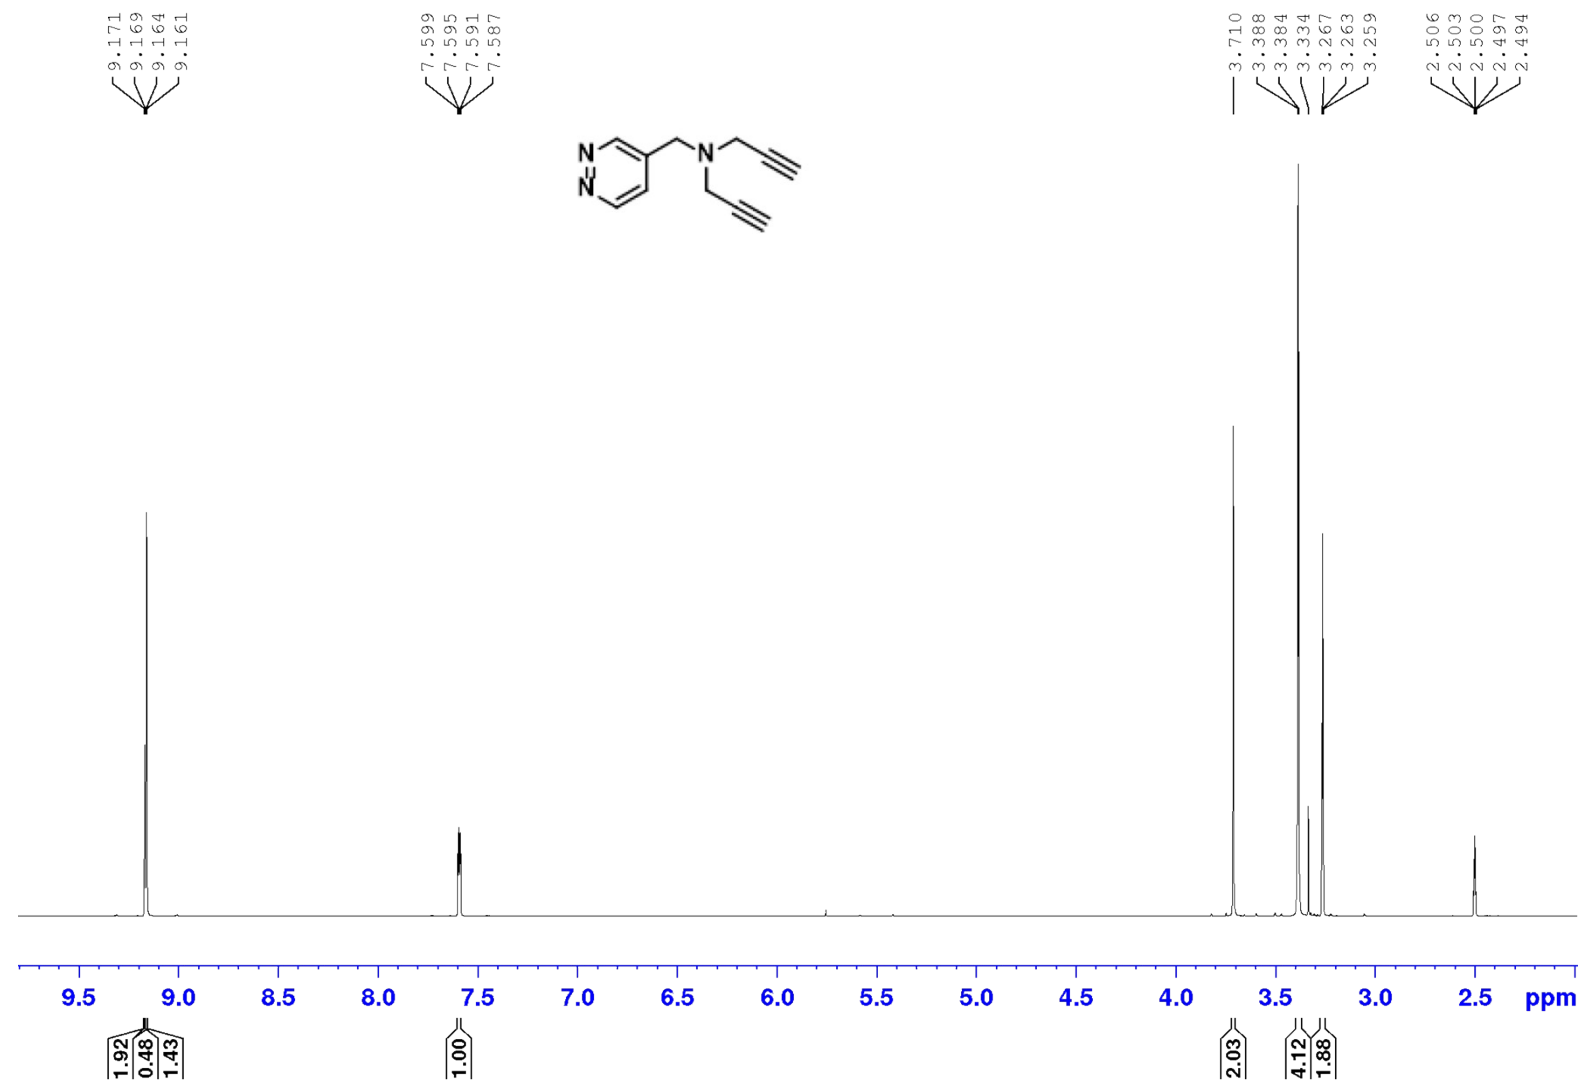

**Fig. S1** <sup>1</sup>H-NMR spectrum of **1** in DMSO-d<sub>6</sub> (600 MHz)

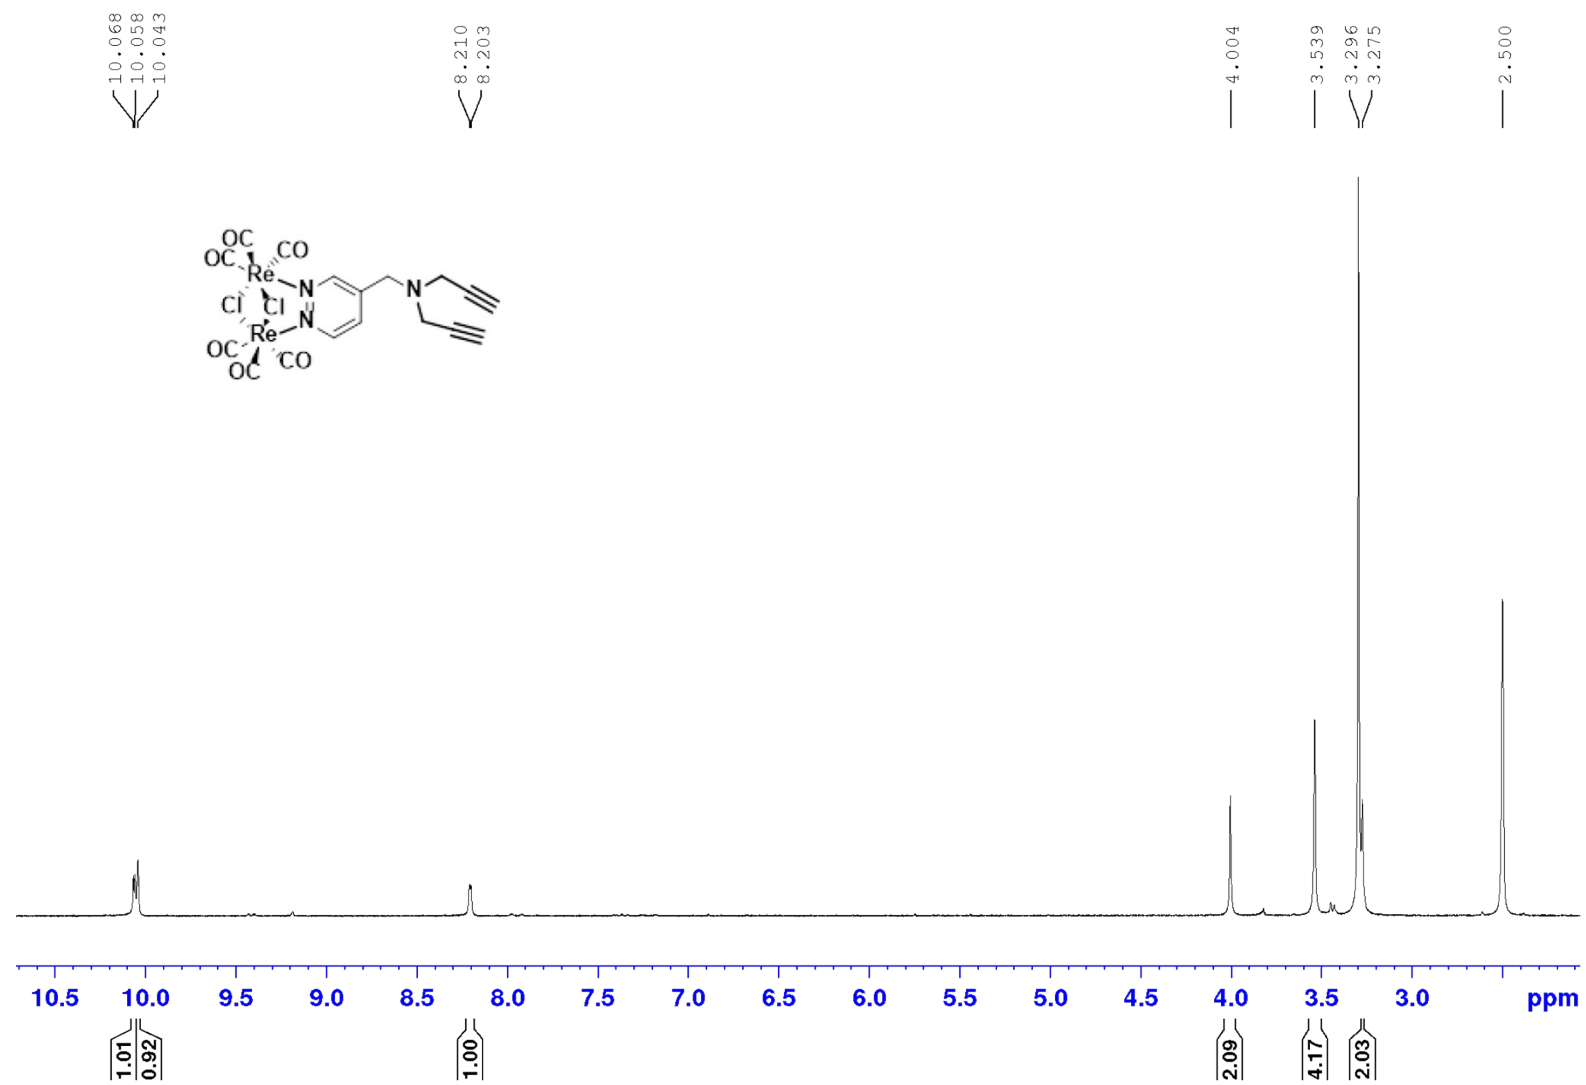

Fig. S2 <sup>1</sup>H-NMR spectrum of **2** in DMSO-d<sub>6</sub> (600 MHz)

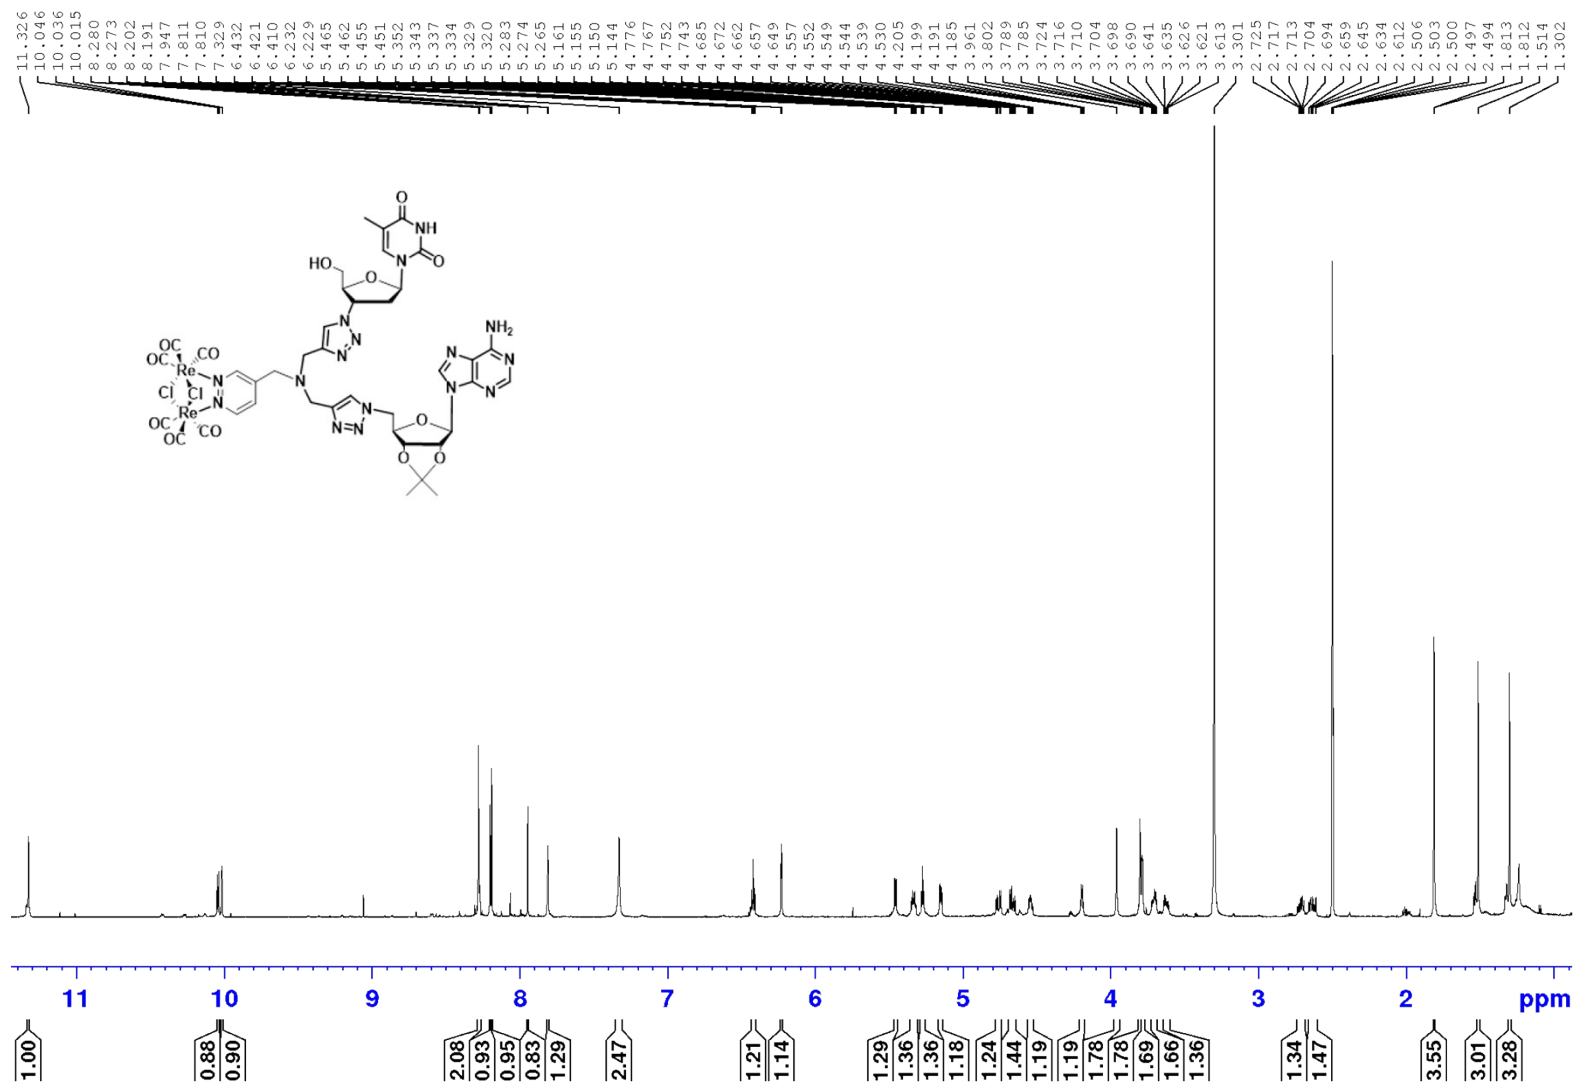

Fig. S3 <sup>1</sup>H-NMR spectrum of 4 in DMSO-d<sub>6</sub> (600 MHz)

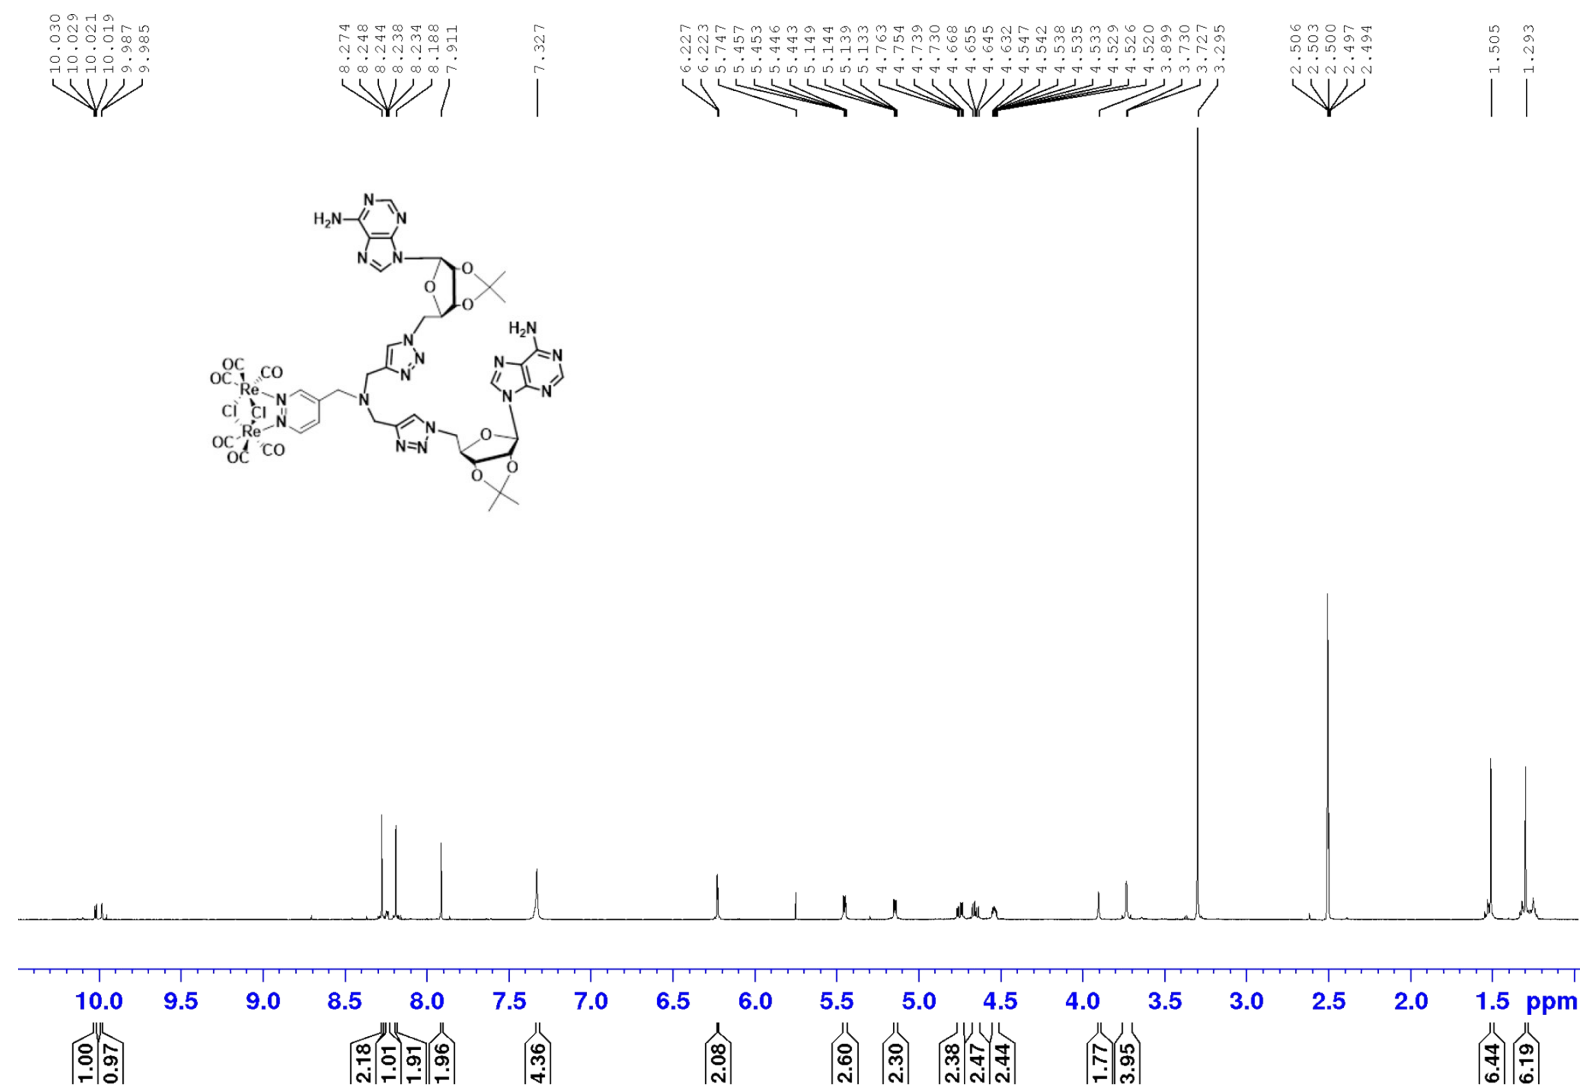

Fig. S4 <sup>1</sup>H-NMR spectrum of **5** in DMSO-d<sub>6</sub> (600 MHz)

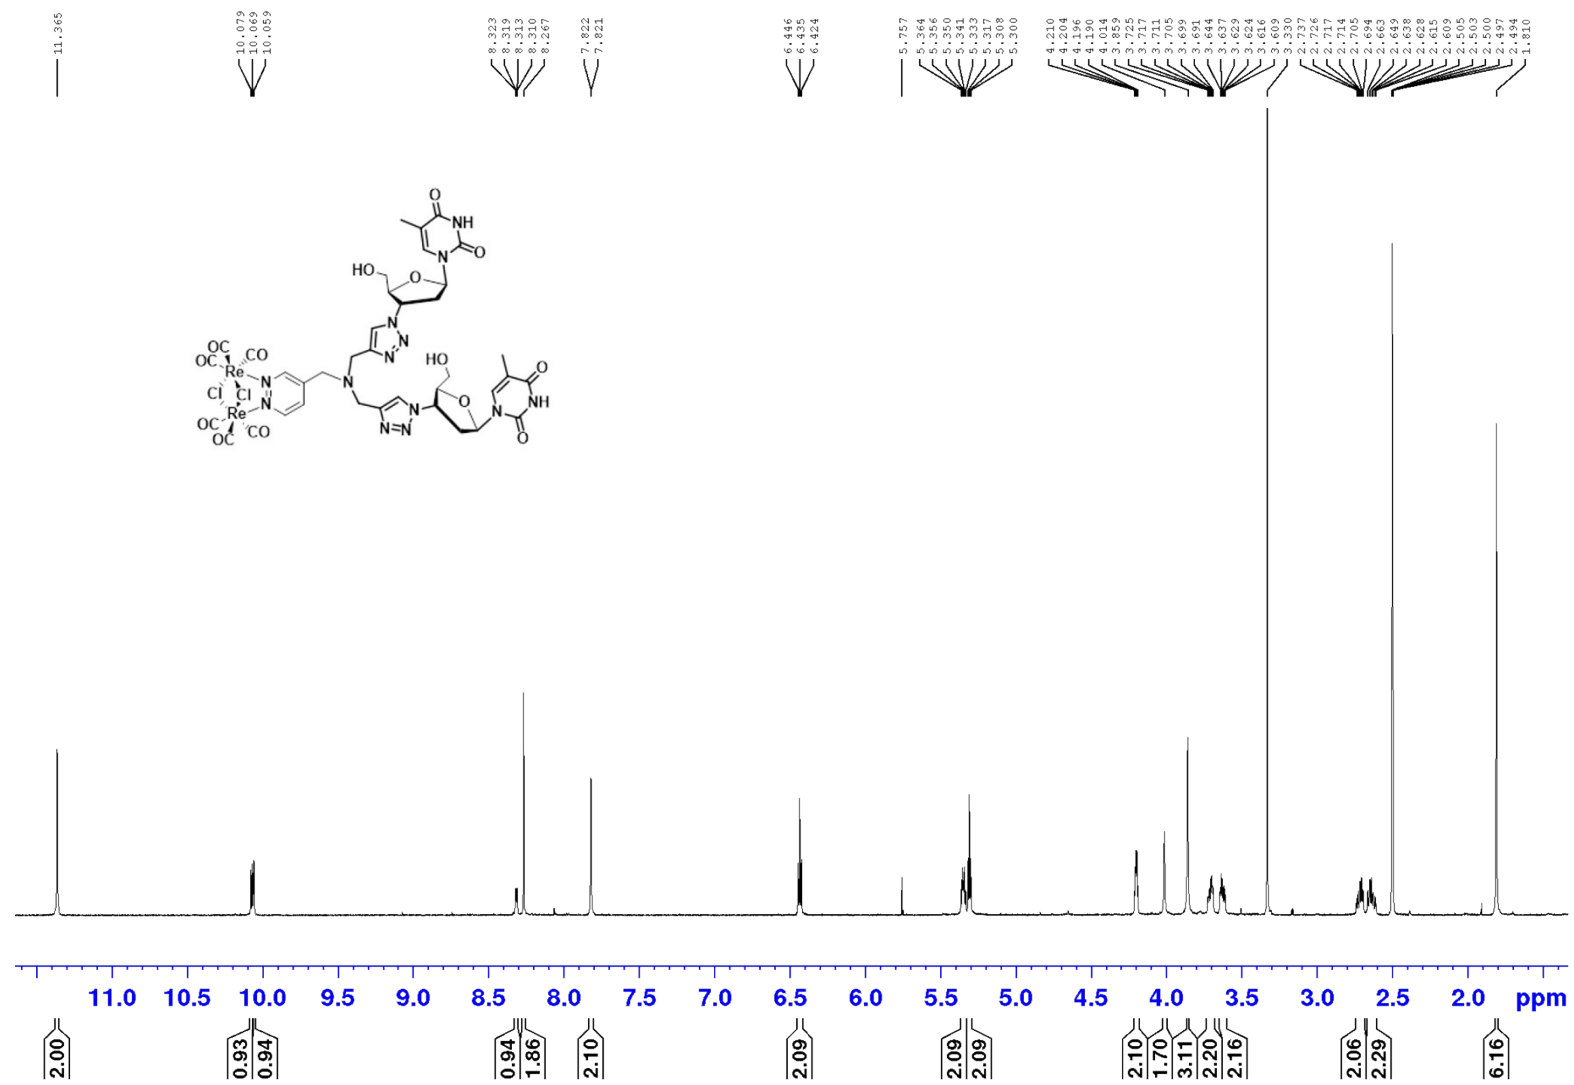

Fig. S5 <sup>1</sup>H-NMR spectrum of **6** in DMSO-d<sub>6</sub> (600 MHz)

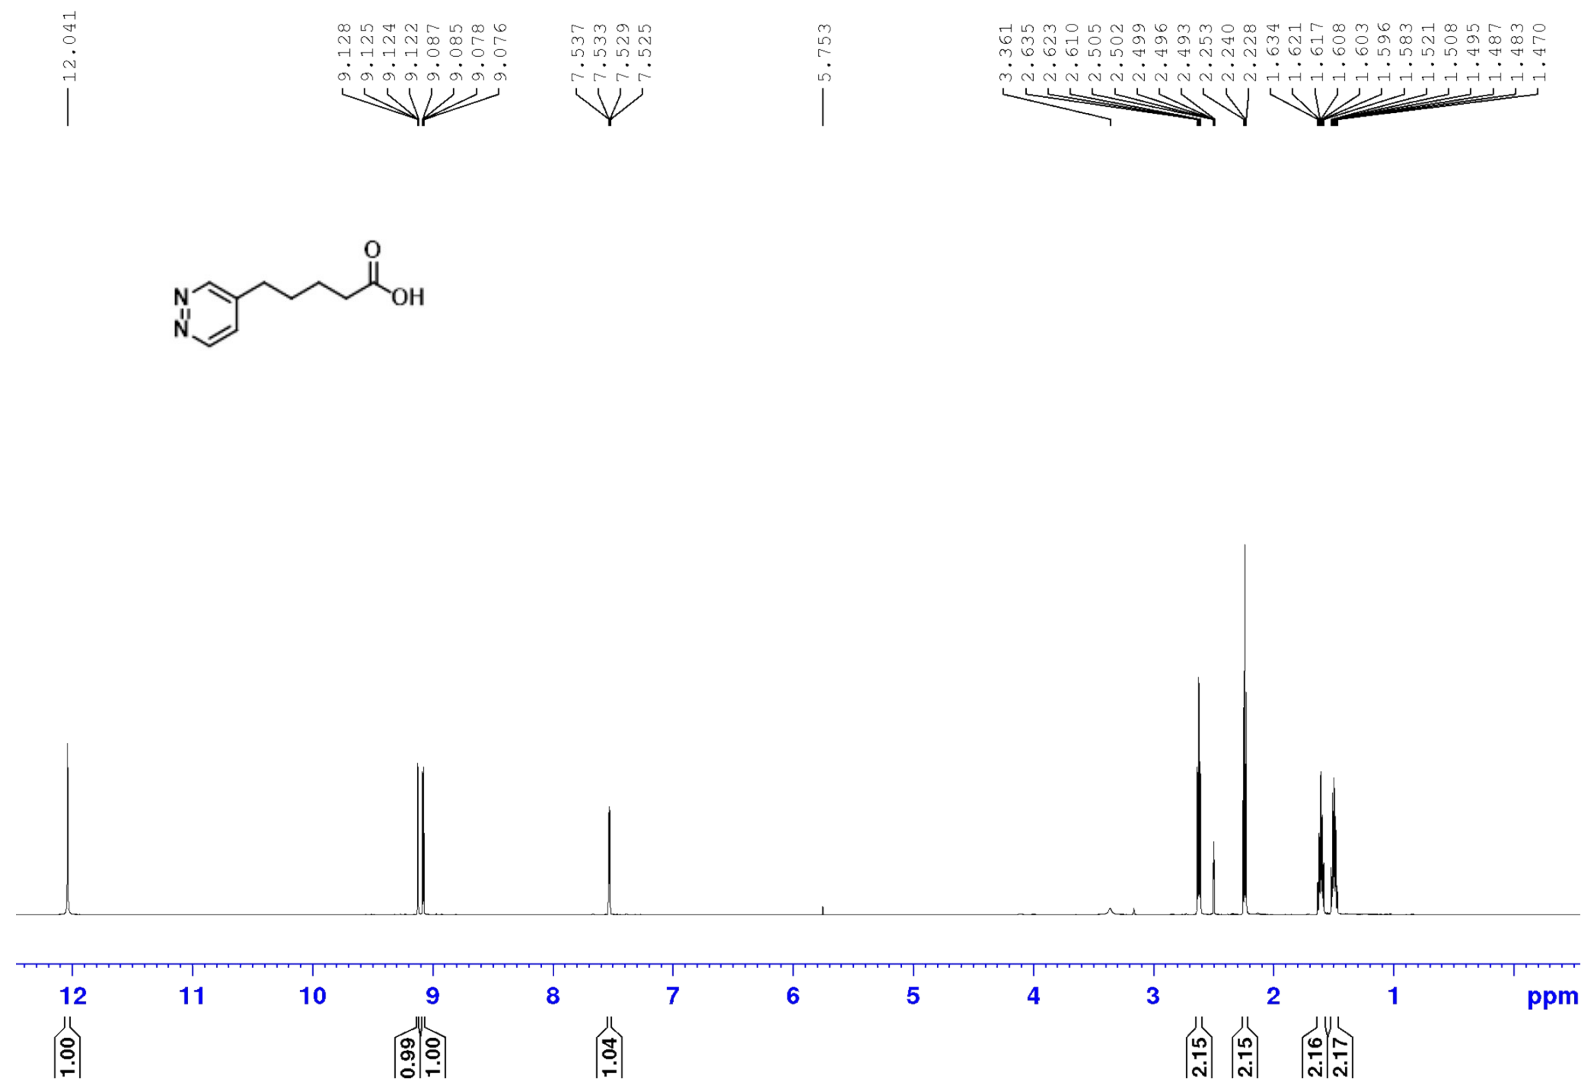

Fig. S6 <sup>1</sup>H-NMR spectrum of 7 in DMSO-d<sub>6</sub> (600 MHz)



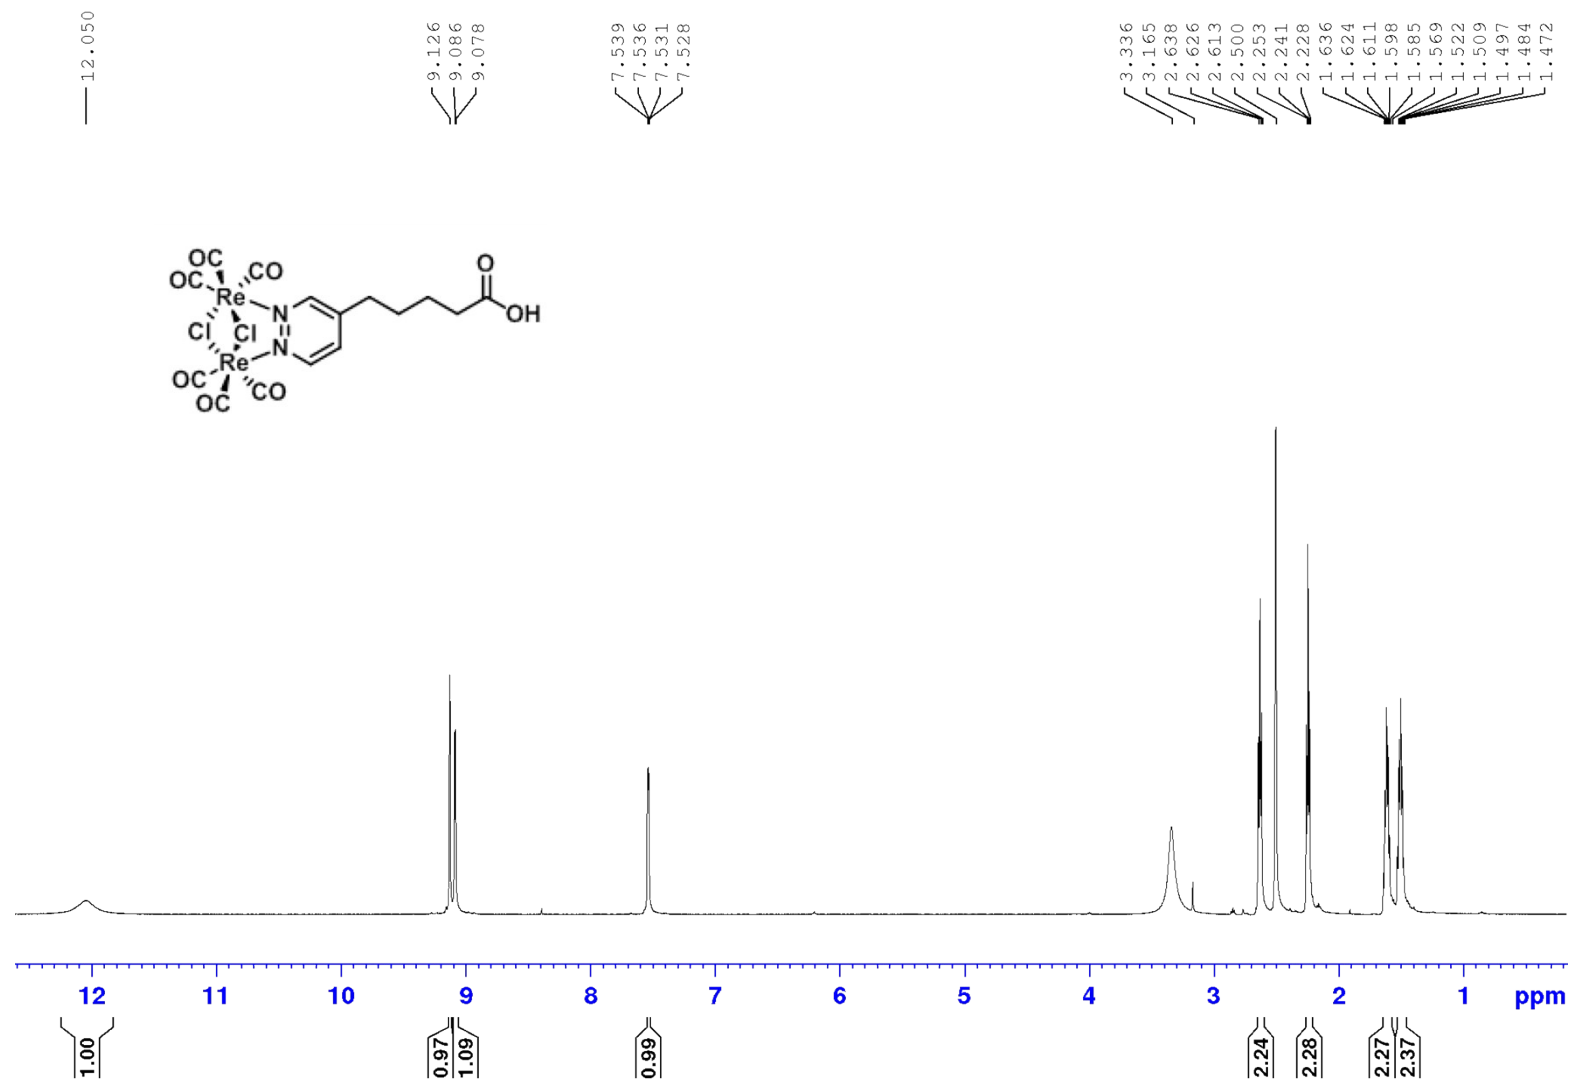

Fig. S7  $^1\text{H-NMR}$  spectrum of **8** in  $\text{DMSO-d}_6$  (600 MHz)

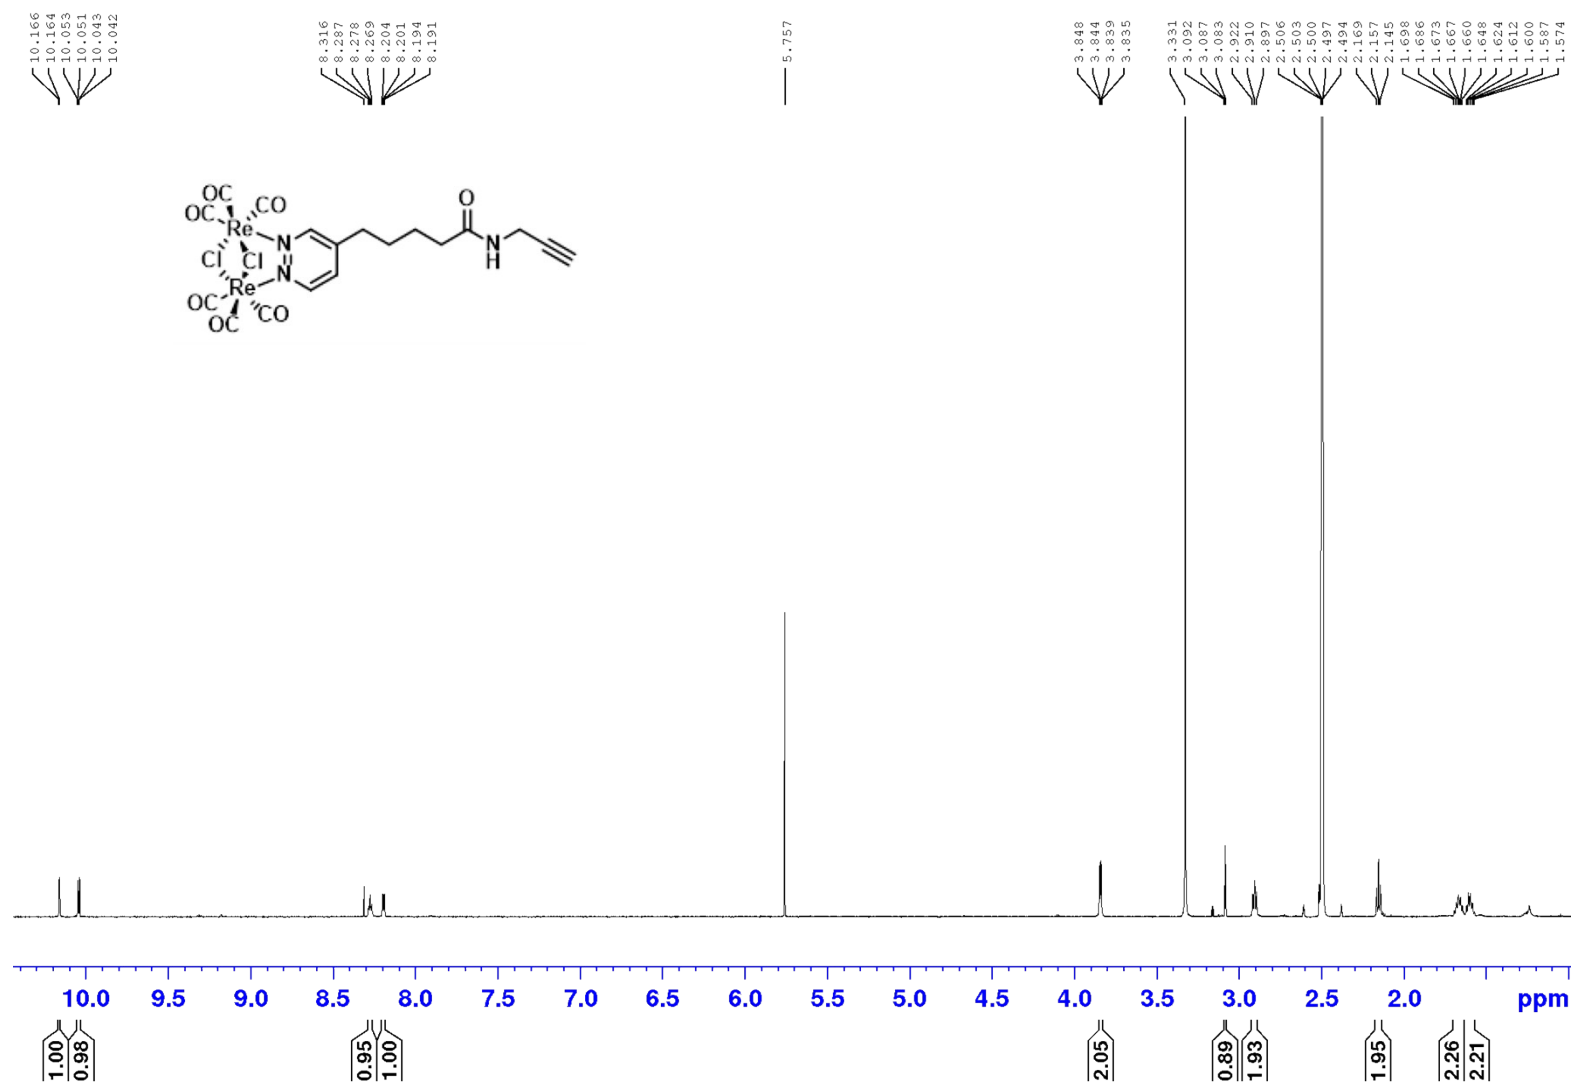

Fig. S8 <sup>1</sup>H-NMR spectrum of **9** in DMSO-d<sub>6</sub> (600 MHz)

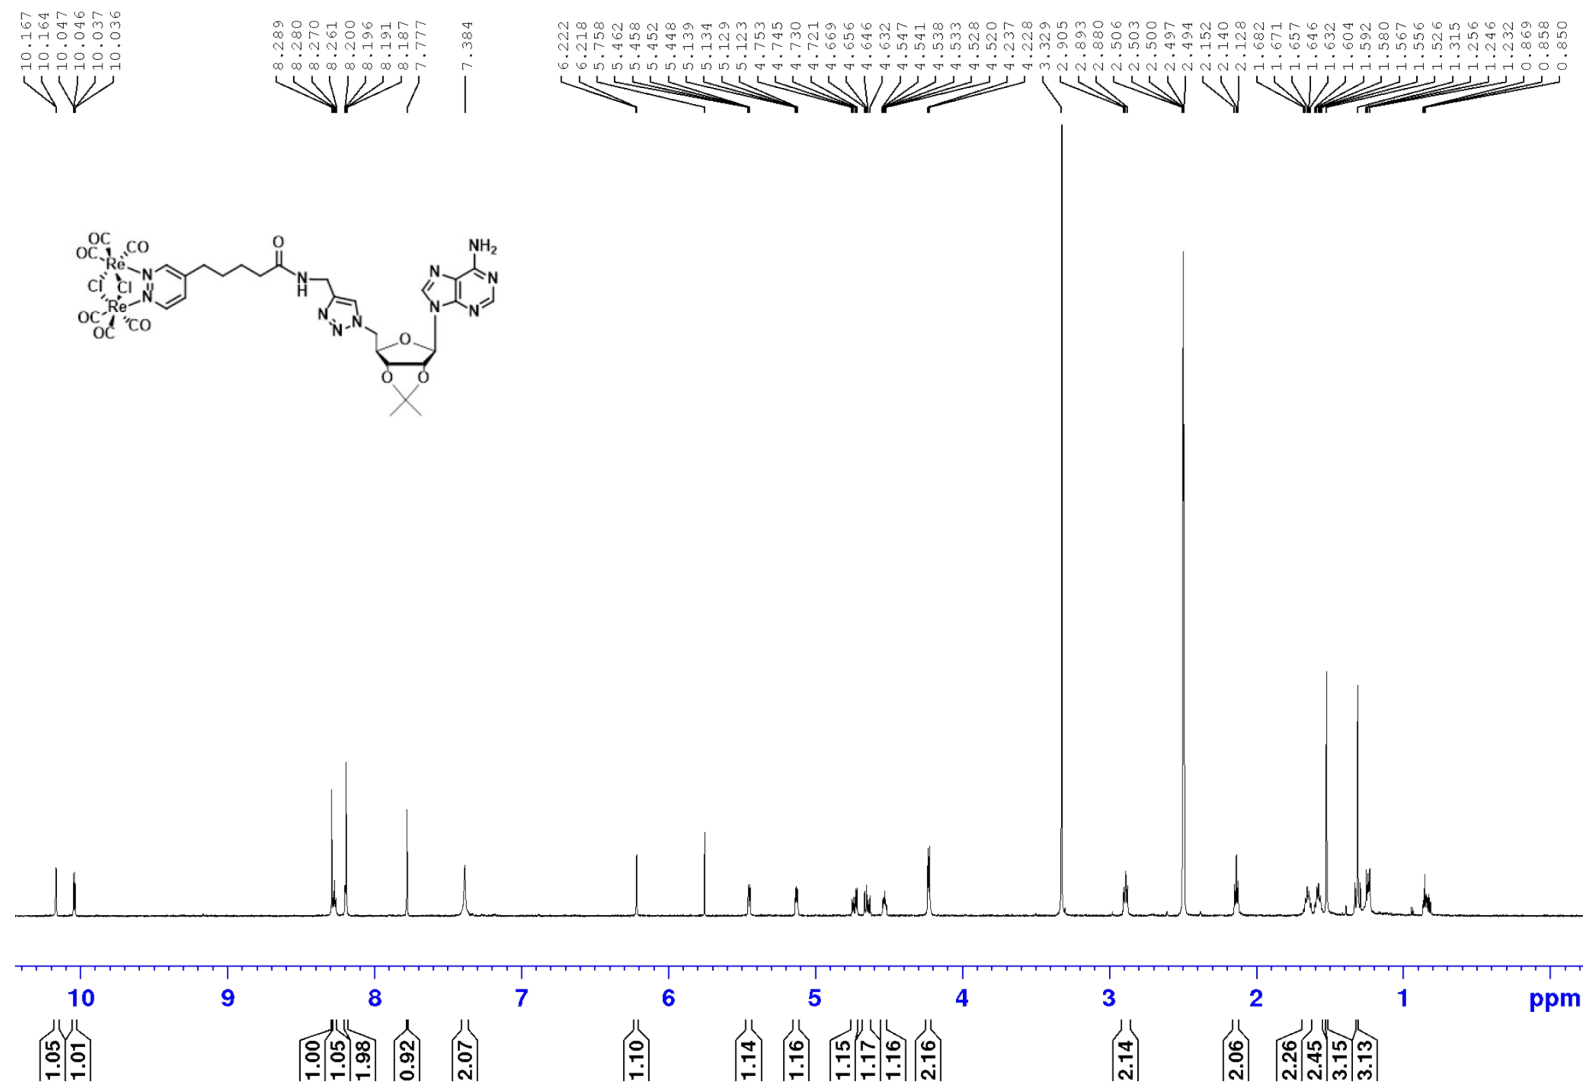

Fig. S9  $^1\text{H-NMR}$  spectrum of **10** in  $\text{DMSO-d}_6$  (600 MHz)

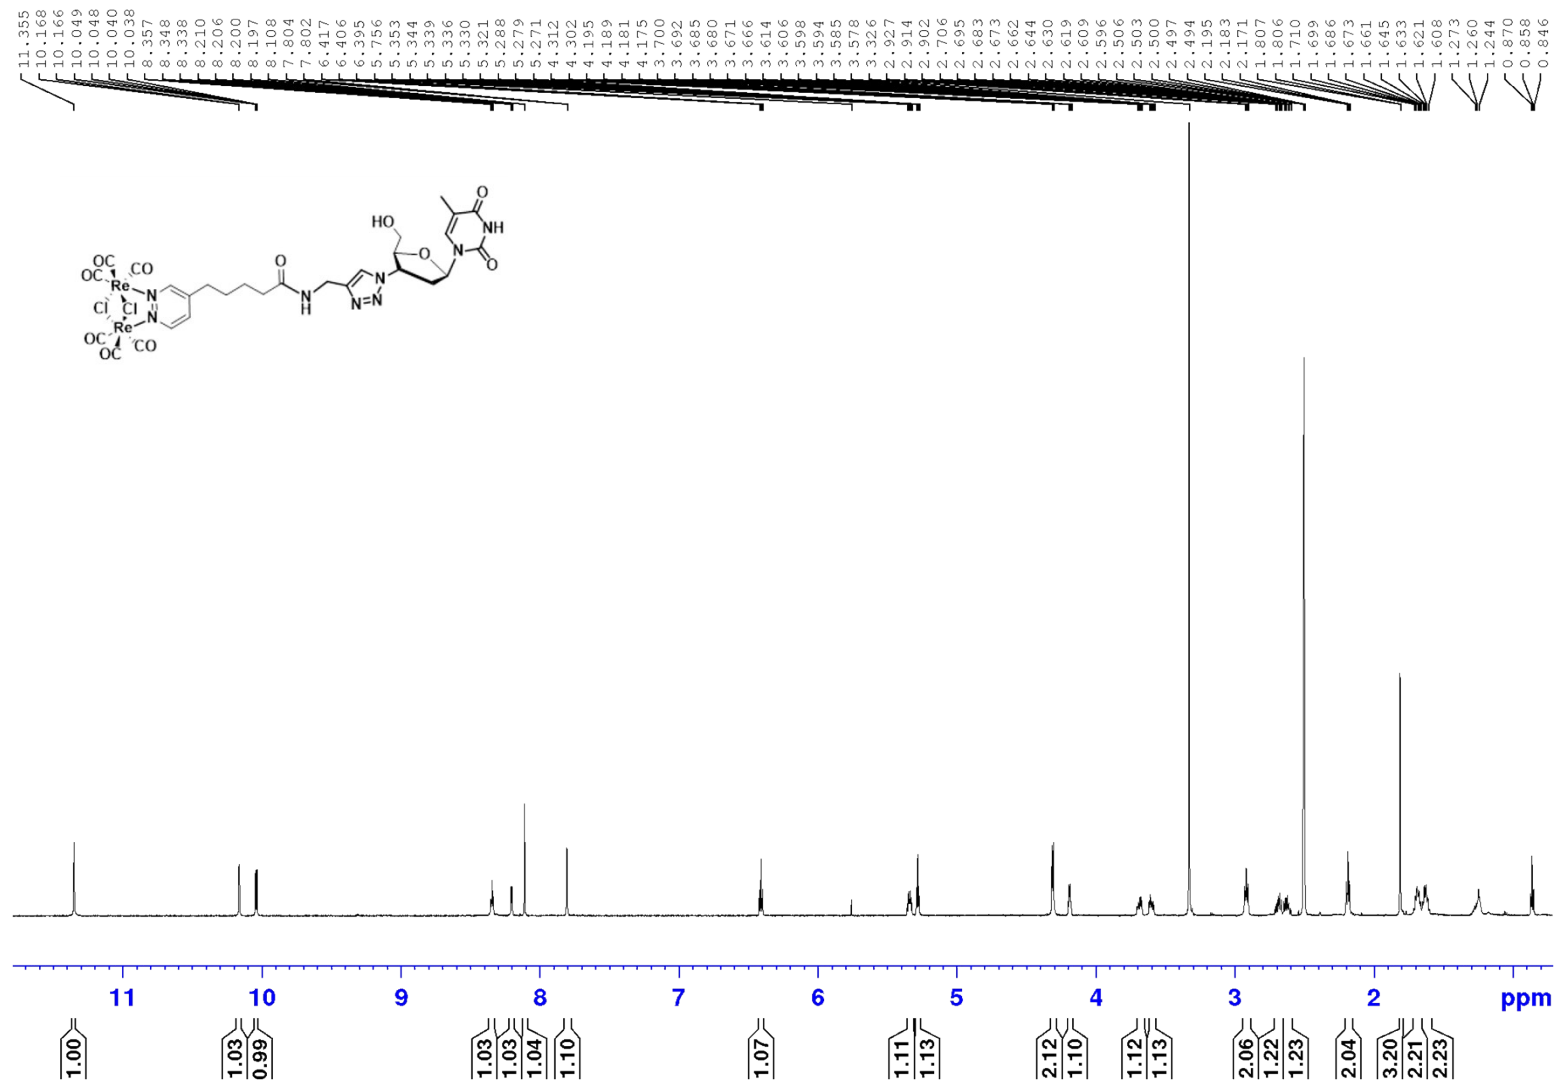

Fig. S10 <sup>1</sup>H-NMR spectrum of **11** in DMSO-d<sub>6</sub> (600 MHz)

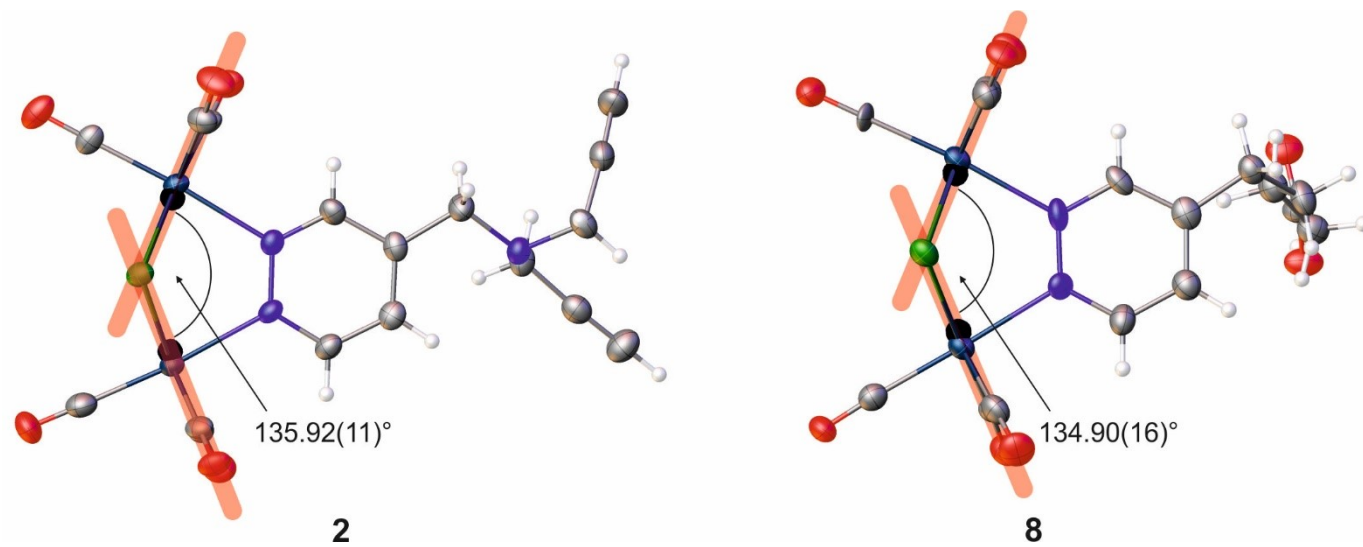

**Fig. S21** inclination of the planes defined by the equatorial C-atoms and bridging Cl atoms within the coordination spheres of Re1 and Re2 in **2** and **8**

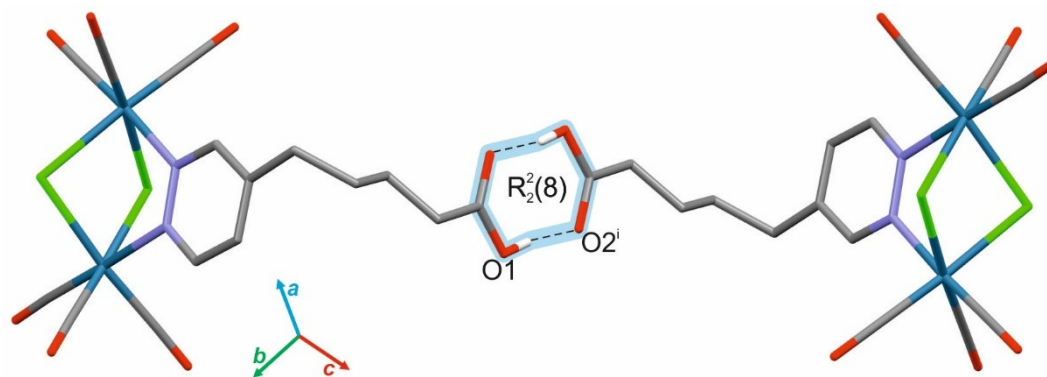

**Fig. S22** Individual molecules of **8** held together by the O–H···O hydrogen bonds arranged in  $R_2^2(8)$  motif

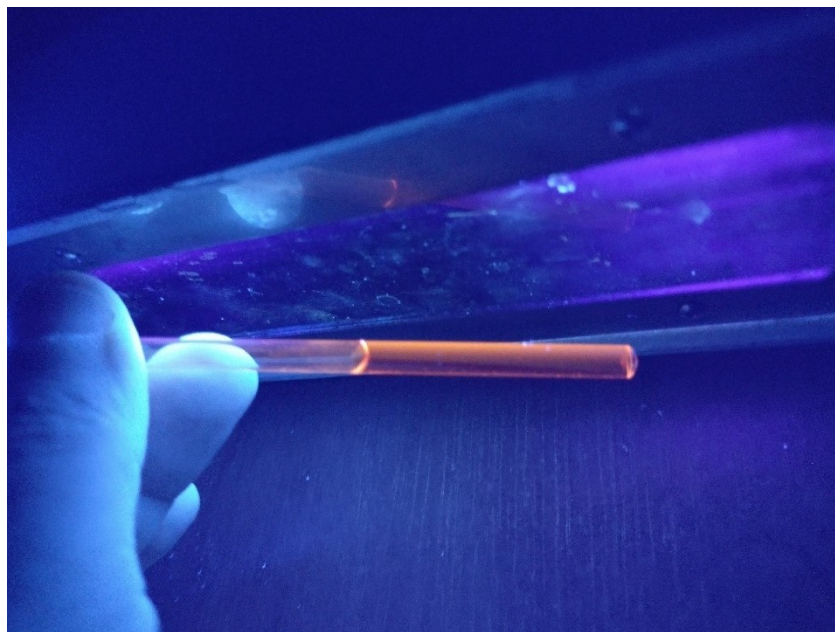

**Fig. S13** Luminescence of **5** in air-equilibrated DMSO solution at ambient temperature

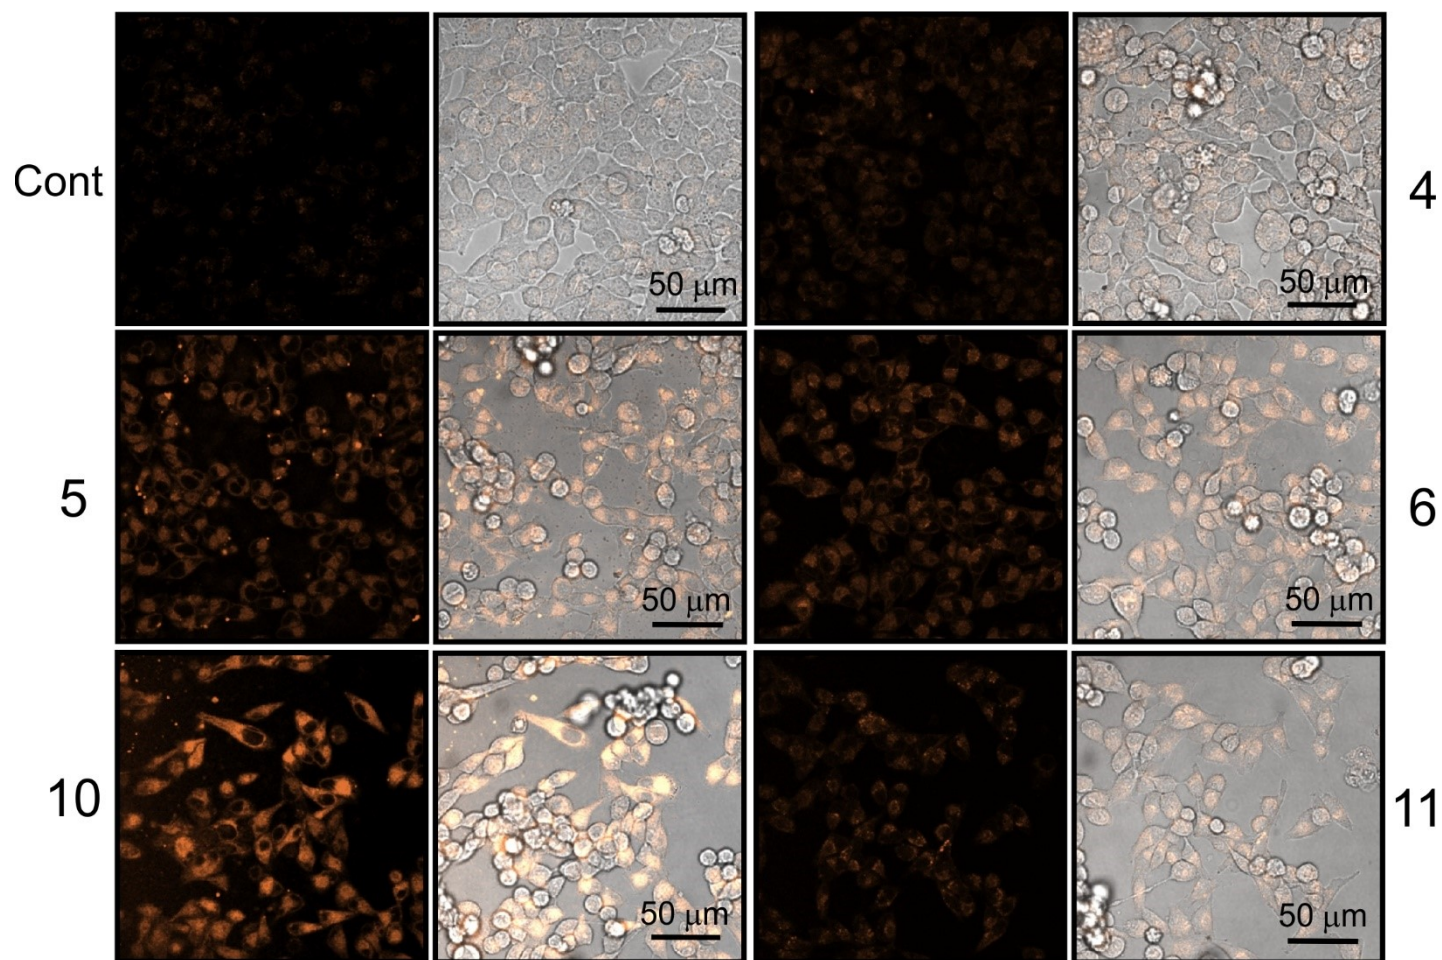

**Fig. 14** Comparison of luminescence of HeLa cells after 30 min incubation with dinucleosides (**4**, **5**, **6**) and nucleosides (**10**, **11**) given at a concentration of 10  $\mu$ M with control cells (Cont.). Left column – luminescence images, right column - merged images of luminescence and transmitted light. Excitation/emission - 405/500 – 700 nm. Bars = 50  $\mu$ m.



**Table S1.** Crystal data and structure refinement for **2** and **8**

| Identification code                                           | 2                                                                                             | 8                                                                                             |
|---------------------------------------------------------------|-----------------------------------------------------------------------------------------------|-----------------------------------------------------------------------------------------------|
| Empirical formula                                             | C <sub>17</sub> H <sub>11</sub> Cl <sub>2</sub> N <sub>3</sub> O <sub>6</sub> Re <sub>2</sub> | C <sub>15</sub> H <sub>12</sub> Cl <sub>2</sub> N <sub>2</sub> O <sub>8</sub> Re <sub>2</sub> |
| Formula weight                                                | 796.59                                                                                        | 791.57                                                                                        |
| Temperature/K                                                 | 100(2)                                                                                        | 100(2)                                                                                        |
| Crystal system                                                | monoclinic                                                                                    | monoclinic                                                                                    |
| Space group                                                   | <i>P</i> 2 <sub>1</sub> / <i>n</i>                                                            | <i>P</i> 2 <sub>1</sub> / <i>n</i>                                                            |
| <i>a</i> /Å                                                   | 19.1476(4)                                                                                    | 9.8252(4)                                                                                     |
| <i>b</i> /Å                                                   | 6.13921(8)                                                                                    | 21.1777(7)                                                                                    |
| <i>c</i> /Å                                                   | 20.3399(4)                                                                                    | 10.3389(4)                                                                                    |
| $\alpha$ /°                                                   | 90                                                                                            | 90                                                                                            |
| $\beta$ /°                                                    | 115.439(2)                                                                                    | 107.937(5)                                                                                    |
| $\gamma$ /°                                                   | 90                                                                                            | 90                                                                                            |
| Volume/Å <sup>3</sup>                                         | 2159.15(8)                                                                                    | 2046.70(15)                                                                                   |
| <i>Z</i>                                                      | 4                                                                                             | 4                                                                                             |
| $\rho_{\text{calc}}$ /g/cm <sup>3</sup>                       | 2.451                                                                                         | 2.569                                                                                         |
| $\mu$ /mm <sup>-1</sup>                                       | 24.224                                                                                        | 25.605                                                                                        |
| <i>F</i> (000)                                                | 1464.0                                                                                        | 1456.0                                                                                        |
| Crystal size/mm <sup>3</sup>                                  | 0.24 × 0.05 × 0.03                                                                            | 0.16 × 0.11 × 0.06                                                                            |
| Radiation                                                     | CuK $\alpha$ ( $\lambda$ = 1.54184)                                                           | CuK $\alpha$ ( $\lambda$ = 1.54184)                                                           |
| 2 $\theta$ range for data collection/°                        | 8.394 to 134.158                                                                              | 8.35 to 134.142                                                                               |
| Index ranges                                                  | -21 ≤ <i>h</i> ≤ 22,<br>-7 ≤ <i>k</i> ≤ 7,<br>-24 ≤ <i>l</i> ≤ 23                             | -11 ≤ <i>h</i> ≤ 11,<br>-17 ≤ <i>k</i> ≤ 25,<br>-12 ≤ <i>l</i> ≤ 12                           |
| Reflections collected                                         | 17830                                                                                         | 7816                                                                                          |
| Independent reflections                                       | 3855 [ <i>R</i> <sub>int</sub> = 0.0411,<br><i>R</i> <sub>sigma</sub> = 0.0322]               | 3647 [ <i>R</i> <sub>int</sub> = 0.0338,<br><i>R</i> <sub>sigma</sub> = 0.0382]               |
| Data/restraints/parameters                                    | 3855/0/271                                                                                    | 3647/1/265                                                                                    |
| Goodness-of-fit on <i>F</i> <sup>2</sup>                      | 1.064                                                                                         | 1.091                                                                                         |
| Final <i>R</i> indexes [ <i>I</i> >= 2 $\sigma$ ( <i>I</i> )] | <i>R</i> <sub>1</sub> = 0.0270, w <i>R</i> <sub>2</sub> = 0.0643                              | <i>R</i> <sub>1</sub> = 0.0389, w <i>R</i> <sub>2</sub> = 0.1028                              |
| Final <i>R</i> indexes [all data]                             | <i>R</i> <sub>1</sub> = 0.0305, w <i>R</i> <sub>2</sub> = 0.0663                              | <i>R</i> <sub>1</sub> = 0.0439, w <i>R</i> <sub>2</sub> = 0.1063                              |
| Largest diff. peak/hole / e Å <sup>-3</sup>                   | 1.35/-0.89                                                                                    | 2.62/-1.43                                                                                    |



**Table S2.** Bond lengths for **2** [Å].

| Atom | Atom | Length/Å  | Atom | Atom | Length/Å   |
|------|------|-----------|------|------|------------|
| C1   | C2   | 1.408(8)  | C13  | Re1  | 1.942(7)   |
| C1   | N2   | 1.328(7)  | C14  | O3   | 1.153(7)   |
| C2   | C3   | 1.351(8)  | C14  | Re1  | 1.899(6)   |
| C2   | C5   | 1.508(8)  | C15  | O4   | 1.142(8)   |
| C3   | C4   | 1.396(9)  | C15  | Re2  | 1.905(6)   |
| C4   | N1   | 1.335(7)  | C16  | O5   | 1.152(7)   |
| C5   | N3   | 1.455(7)  | C16  | Re2  | 1.914(6)   |
| C6   | C7   | 1.478(9)  | C17  | O6   | 1.157(7)   |
| C6   | N3   | 1.453(7)  | C17  | Re2  | 1.907(6)   |
| C7   | C8   | 1.196(10) | C11  | Re1  | 2.4830(12) |
| C9   | C10  | 1.493(9)  | C11  | Re2  | 2.4925(13) |
| C9   | N3   | 1.478(7)  | C12  | Re1  | 2.4978(12) |
| C10  | C11  | 1.180(10) | C12  | Re2  | 2.5034(12) |
| C12  | O1   | 1.140(7)  | N1   | N2   | 1.354(6)   |
| C12  | Re1  | 1.918(6)  | N1   | Re1  | 2.204(5)   |
| C13  | O2   | 1.130(8)  | N2   | Re2  | 2.204(4)   |

**Table S3.** Values of valence angles for **2** [°].

| Atom | Atom | Atom | Angle/°  | Atom | Atom | Atom | Angle/°    |
|------|------|------|----------|------|------|------|------------|
| N2   | C1   | C2   | 124.0(5) | C12  | Re1  | C11  | 95.76(17)  |
| C1   | C2   | C5   | 120.1(5) | C12  | Re1  | C12  | 175.34(17) |
| C3   | C2   | C1   | 116.5(5) | C12  | Re1  | N1   | 92.3(2)    |

|     |     |     |          |     |     |     |            |
|-----|-----|-----|----------|-----|-----|-----|------------|
| C3  | C2  | C5  | 123.3(5) | C13 | Re1 | C11 | 93.08(19)  |
| C2  | C3  | C4  | 118.8(5) | C13 | Re1 | C12 | 93.72(19)  |
| N1  | C4  | C3  | 122.3(5) | C13 | Re1 | N1  | 174.8(2)   |
| N3  | C5  | C2  | 110.7(5) | C14 | Re1 | C12 | 89.3(2)    |
| N3  | C6  | C7  | 111.4(5) | C14 | Re1 | C13 | 90.2(3)    |
| C8  | C7  | C6  | 176.8(7) | C14 | Re1 | C11 | 173.99(18) |
| N3  | C9  | C10 | 113.0(5) | C14 | Re1 | C12 | 93.34(16)  |
| C11 | C10 | C9  | 175.2(7) | C14 | Re1 | N1  | 94.4(2)    |
| O1  | C12 | Re1 | 178.6(5) | C11 | Re1 | C12 | 81.41(4)   |
| O2  | C13 | Re1 | 177.9(6) | N1  | Re1 | C11 | 82.15(11)  |
| O3  | C14 | Re1 | 177.9(5) | N1  | Re1 | C12 | 83.63(12)  |
| O4  | C15 | Re2 | 177.6(6) | C15 | Re2 | C16 | 87.8(3)    |
| O5  | C16 | Re2 | 178.9(6) | C15 | Re2 | C17 | 89.2(2)    |
| O6  | C17 | Re2 | 178.5(5) | C15 | Re2 | C11 | 175.57(18) |
| Re1 | C11 | Re2 | 90.91(4) | C15 | Re2 | C12 | 94.46(17)  |
| Re1 | C12 | Re2 | 90.31(4) | C15 | Re2 | N2  | 96.1(2)    |
| C4  | N1  | N2  | 119.9(5) | C16 | Re2 | C11 | 92.81(19)  |
| C4  | N1  | Re1 | 120.1(4) | C16 | Re2 | C12 | 95.49(17)  |
| N2  | N1  | Re1 | 120.1(3) | C16 | Re2 | N2  | 175.8(2)   |
| C1  | N2  | N1  | 118.4(4) | C17 | Re2 | C16 | 88.2(2)    |
| C1  | N2  | Re2 | 122.0(4) | C17 | Re2 | C11 | 95.18(17)  |
| N1  | N2  | Re2 | 119.5(3) | C17 | Re2 | C12 | 174.85(16) |
| C5  | N3  | C9  | 111.6(5) | C17 | Re2 | N2  | 93.3(2)    |
| C6  | N3  | C5  | 110.8(5) | C11 | Re2 | C12 | 81.12(4)   |
| C6  | N3  | C9  | 111.2(5) | N2  | Re2 | C11 | 83.15(12)  |
| C12 | Re1 | C13 | 90.1(2)  | N2  | Re2 | C12 | 82.75(12)  |

**Table S4.** Values of torsion angles for **2** [ $^{\circ}$ ].

| A  | B  | C  | D   | Angle/ $^{\circ}$ | A   | B  | C  | D   | Angle/ $^{\circ}$ |
|----|----|----|-----|-------------------|-----|----|----|-----|-------------------|
| C1 | C2 | C3 | C4  | -1.6(8)           | C4  | N1 | N2 | Re2 | 175.8(4)          |
| C1 | C2 | C5 | N3  | -167.5(5)         | C5  | C2 | C3 | C4  | 176.7(5)          |
| C2 | C1 | N2 | N1  | -0.3(8)           | C7  | C6 | N3 | C5  | -175.2(5)         |
| C2 | C1 | N2 | Re2 | -177.5(4)         | C7  | C6 | N3 | C9  | 60.1(7)           |
| C2 | C3 | C4 | N1  | -0.1(8)           | C10 | C9 | N3 | C5  | -63.3(7)          |
| C2 | C5 | N3 | C6  | 76.3(6)           | C10 | C9 | N3 | C6  | 61.0(7)           |
| C2 | C5 | N3 | C9  | -159.1(5)         | N2  | C1 | C2 | C3  | 1.9(8)            |
| C3 | C2 | C5 | N3  | 14.1(8)           | N2  | C1 | C2 | C5  | -176.6(5)         |
| C3 | C4 | N1 | N2  | 1.7(8)            | Re1 | N1 | N2 | C1  | 178.2(4)          |
| C3 | C4 | N1 | Re1 | -178.0(4)         | Re1 | N1 | N2 | Re2 | -4.4(5)           |
| C4 | N1 | N2 | C1  | -1.5(7)           |     |    |    |     |                   |

**Table S5.** Bond lengths for **8** [ $\text{\AA}$ ].

| Atom | Atom | Length/ $\text{\AA}$ | Atom | Atom | Length/ $\text{\AA}$ |
|------|------|----------------------|------|------|----------------------|
|------|------|----------------------|------|------|----------------------|

|     |     |           |     |     |            |
|-----|-----|-----------|-----|-----|------------|
| C1  | C2  | 1.412(13) | C12 | O5  | 1.173(11)  |
| C1  | N2  | 1.337(11) | C12 | Re1 | 1.892(10)  |
| C2  | C3  | 1.362(14) | C13 | O6  | 1.176(11)  |
| C2  | C5  | 1.500(13) | C13 | Re2 | 1.889(10)  |
| C3  | C4  | 1.384(13) | C14 | O7  | 1.140(10)  |
| C4  | N1  | 1.341(11) | C14 | Re2 | 1.922(7)   |
| C5  | C6  | 1.554(13) | C15 | O8  | 1.170(11)  |
| C6  | C7  | 1.533(13) | C15 | Re2 | 1.897(9)   |
| C7  | C8  | 1.508(13) | Cl1 | Re1 | 2.5033(19) |
| C8  | C9  | 1.489(13) | Cl1 | Re2 | 2.4921(19) |
| C9  | O1  | 1.306(11) | Cl2 | Re1 | 2.503(2)   |
| C9  | O2  | 1.227(11) | Cl2 | Re2 | 2.4883(19) |
| C10 | O3  | 1.148(11) | N1  | N2  | 1.356(10)  |
| C10 | Re1 | 1.905(9)  | N1  | Re1 | 2.204(7)   |
| C11 | O4  | 1.130(11) | N2  | Re2 | 2.182(7)   |
| C11 | Re1 | 1.935(9)  |     |     |            |

**Table S6.** Values of valence angles for **8** [°].

| Atom | Atom | Atom | Angle/°  | Atom | Atom | Atom | Angle/°  |
|------|------|------|----------|------|------|------|----------|
| N2   | C1   | C2   | 124.9(9) | C10  | Re1  | Cl2  | 174.3(3) |
| C1   | C2   | C5   | 120.2(9) | C10  | Re1  | N1   | 95.1(3)  |
| C3   | C2   | C1   | 116.3(9) | C11  | Re1  | Cl1  | 95.9(3)  |
| C3   | C2   | C5   | 123.6(9) | C11  | Re1  | Cl2  | 96.0(3)  |
| C2   | C3   | C4   | 118.3(9) | C11  | Re1  | N1   | 178.2(3) |
| N1   | C4   | C3   | 123.1(9) | C12  | Re1  | C10  | 89.8(4)  |
| C2   | C5   | C6   | 111.4(8) | C12  | Re1  | C11  | 89.2(4)  |
| C7   | C6   | C5   | 110.9(8) | C12  | Re1  | Cl1  | 173.8(3) |
| C8   | C7   | C6   | 110.7(8) | C12  | Re1  | Cl2  | 95.4(3)  |
| C9   | C8   | C7   | 114.2(8) | C12  | Re1  | N1   | 92.0(3)  |

|     |     |     |          |     |     |     |           |
|-----|-----|-----|----------|-----|-----|-----|-----------|
| O1  | C9  | C8  | 114.5(8) | C11 | Re1 | C12 | 80.61(6)  |
| O2  | C9  | C8  | 122.6(8) | N1  | Re1 | C11 | 82.90(18) |
| O2  | C9  | O1  | 122.9(8) | N1  | Re1 | C12 | 82.46(19) |
| O3  | C10 | Re1 | 177.0(7) | C13 | Re2 | C14 | 89.6(4)   |
| O4  | C11 | Re1 | 176.8(8) | C13 | Re2 | C15 | 87.5(4)   |
| O5  | C12 | Re1 | 178.6(9) | C13 | Re2 | C11 | 174.0(3)  |
| O6  | C13 | Re2 | 178.7(8) | C13 | Re2 | C12 | 93.7(3)   |
| O7  | C14 | Re2 | 179.0(9) | C13 | Re2 | N2  | 94.4(3)   |
| O8  | C15 | Re2 | 176.9(8) | C14 | Re2 | C11 | 93.7(3)   |
| Re2 | C11 | Re1 | 90.78(6) | C14 | Re2 | C12 | 93.6(3)   |
| Re2 | C12 | Re1 | 90.87(6) | C14 | Re2 | N2  | 175.4(3)  |
| C4  | N1  | N2  | 120.4(7) | C15 | Re2 | C14 | 89.7(4)   |
| C4  | N1  | Re1 | 120.2(6) | C15 | Re2 | C11 | 97.4(3)   |
| N2  | N1  | Re1 | 119.4(5) | C15 | Re2 | C12 | 176.4(3)  |
| C1  | N2  | N1  | 117.1(7) | C15 | Re2 | N2  | 92.8(3)   |
| C1  | N2  | Re2 | 122.2(6) | C12 | Re2 | C11 | 81.12(7)  |
| N1  | N2  | Re2 | 120.7(5) | N2  | Re2 | C11 | 82.1(2)   |
| C10 | Re1 | C11 | 86.4(4)  | N2  | Re2 | C12 | 83.78(19) |
| C10 | Re1 | C11 | 94.0(2)  |     |     |     |           |

**Table S7.** Values of torsion angles for **8** [°].

| A  | B  | C  | D  | Angle/°   | A  | B  | C  | D   | Angle/°   |
|----|----|----|----|-----------|----|----|----|-----|-----------|
| C1 | C2 | C3 | C4 | 2.0(13)   | C4 | N1 | N2 | Re2 | -176.9(6) |
| C1 | C2 | C5 | C6 | -130.9(9) | C5 | C2 | C3 | C4  | -178.6(9) |
| C2 | C1 | N2 | N1 | 0.4(12)   | C5 | C6 | C7 | C8  | -165.9(8) |

|              |          |               |           |
|--------------|----------|---------------|-----------|
| C2 C1 N2 Re2 | 178.0(7) | C6 C7 C8 C9   | -167.2(8) |
| C2 C3 C4 N1  | -1.1(14) | C7 C8 C9 O1   | -149.8(9) |
| C2 C5 C6 C7  | 68.6(10) | C7 C8 C9 O2   | 33.1(13)  |
| C3 C2 C5 C6  | 49.7(12) | N2 C1 C2 C3   | -1.8(13)  |
| C3 C4 N1 N2  | -0.4(13) | N2 C1 C2 C5   | 178.8(8)  |
| C3 C4 N1 Re1 | 178.0(7) | Re1 N1 N2 C1  | -177.7(6) |
| C4 N1 N2 C1  | 0.7(11)  | Re1 N1 N2 Re2 | 4.7(8)    |

**Table S8.** DFT optimized ground state ( $S_0$ ) and  $T_1$  state geometry of **2** in cartesian (XYZ) coordinates.

| State $S_0$ |              |              |              | State $T_1$ |              |              |              |
|-------------|--------------|--------------|--------------|-------------|--------------|--------------|--------------|
| C           | -1.851985000 | 0.753659000  | -0.326587000 | C           | -1.950525000 | 0.546544000  | -0.498222000 |
| H           | -2.021113000 | 1.837778000  | -0.255729000 | H           | -2.226433000 | 1.611903000  | -0.433304000 |
| C           | -2.915810000 | -0.119419000 | -0.526258000 | C           | -2.916988000 | -0.393837000 | -0.767818000 |
| C           | -2.585245000 | -1.459326000 | -0.585469000 | C           | -2.472674000 | -1.739599000 | -0.813909000 |
| H           | -3.352431000 | -2.230261000 | -0.732269000 | H           | -3.162321000 | -2.572687000 | -0.985824000 |
| C           | -1.254192000 | -1.797610000 | -0.450363000 | C           | -1.128705000 | -1.944848000 | -0.606517000 |
| H           | -0.929001000 | -2.845679000 | -0.491260000 | H           | -0.720870000 | -2.968220000 | -0.637122000 |
| C           | -4.308443000 | 0.381724000  | -0.700011000 | C           | -4.330696000 | -0.026474000 | -1.039882000 |
| H           | -4.436144000 | 1.335764000  | -0.128703000 | H           | -4.504172000 | 1.048515000  | -0.771386000 |
| H           | -4.420003000 | 0.677121000  | -1.765031000 | H           | -4.517269000 | -0.084219000 | -2.136698000 |
| C           | -6.530833000 | -0.432431000 | -1.080054000 | C           | -6.570028000 | -0.875597000 | -0.966066000 |
| H           | -7.170539000 | -1.316875000 | -0.883637000 | H           | -7.176853000 | -1.683326000 | -0.507220000 |
| H           | -6.345744000 | -0.448042000 | -2.172760000 | H           | -6.513431000 | -1.128341000 | -2.045172000 |
| C           | -7.253023000 | 0.781341000  | -0.719098000 | C           | -7.255073000 | 0.400325000  | -0.800711000 |
| C           | -7.795805000 | 1.807309000  | -0.373101000 | C           | -7.757068000 | 1.487951000  | -0.628622000 |



|    |              |              |              |    |              |              |              |
|----|--------------|--------------|--------------|----|--------------|--------------|--------------|
| H  | -8.300705000 | 2.715363000  | -0.081440000 | H  | -8.233992000 | 2.443639000  | -0.488030000 |
| C  | -5.421861000 | -0.813546000 | 1.021264000  | C  | -5.220194000 | -0.827608000 | 1.018006000  |
| H  | -5.912374000 | 0.058487000  | 1.527089000  | H  | -5.642657000 | 0.144637000  | 1.387915000  |
| H  | -4.408664000 | -0.867436000 | 1.473012000  | H  | -4.157943000 | -0.823118000 | 1.341534000  |
| C  | -6.141651000 | -2.024844000 | 1.351282000  | C  | -5.903072000 | -1.919068000 | 1.677617000  |
| C  | -6.753153000 | -3.028170000 | 1.639201000  | C  | -6.485385000 | -2.813500000 | 2.245147000  |
| H  | -7.293124000 | -3.925904000 | 1.897192000  | H  | -6.993821000 | -3.614889000 | 2.754164000  |
| C  | 1.338475000  | -3.011211000 | 1.139886000  | C  | 1.576317000  | -2.932940000 | 1.184041000  |
| C  | 3.676464000  | -2.038690000 | 0.133972000  | C  | 3.833078000  | -1.793332000 | 0.214709000  |
| C  | 1.672027000  | -2.797640000 | -1.548590000 | C  | 2.039631000  | -2.624814000 | -1.632785000 |
| C  | 0.298430000  | 3.043554000  | -1.256252000 | C  | 0.106363000  | 3.026566000  | -1.265259000 |
| C  | 2.470892000  | 3.094947000  | 0.390901000  | C  | 2.168153000  | 3.201798000  | 0.505782000  |
| C  | -0.033979000 | 2.831083000  | 1.432557000  | C  | -0.350189000 | 2.723707000  | 1.426415000  |
| Cl | 2.257994000  | 0.428654000  | -1.531566000 | Cl | 2.285243000  | 0.542550000  | -1.437979000 |
| Cl | 1.846557000  | 0.167622000  | 1.767373000  | Cl | 1.748833000  | 0.186101000  | 1.757201000  |
| N  | -0.287364000 | -0.910495000 | -0.268062000 | N  | -0.238665000 | -0.999731000 | -0.367068000 |
| N  | -0.593380000 | 0.370414000  | -0.206016000 | N  | -0.659649000 | 0.293731000  | -0.302321000 |
| N  | -5.280039000 | -0.612949000 | -0.396898000 | N  | -5.247493000 | -0.927672000 | -0.414215000 |
| O  | 1.043418000  | -3.841801000 | 1.868105000  | O  | 1.355750000  | -3.767735000 | 1.920011000  |
| O  | 4.787179000  | -2.258255000 | 0.253508000  | O  | 4.941952000  | -1.970304000 | 0.376834000  |
| O  | 1.578921000  | -3.498188000 | -2.447305000 | O  | 2.090131000  | -3.280286000 | -2.557696000 |
| O  | -0.117927000 | 3.711541000  | -2.085480000 | O  | -0.304991000 | 3.677721000  | -2.106470000 |
| O  | 3.371846000  | 3.770702000  | 0.556646000  | O  | 2.994416000  | 3.950183000  | 0.730036000  |
| O  | -0.651064000 | 3.370177000  | 2.229926000  | O  | -1.037289000 | 3.191452000  | 2.207437000  |
| Re | 1.799521000  | -1.603575000 | -0.064310000 | Re | 1.938007000  | -1.477301000 | -0.061542000 |
| Re | 0.976174000  | 1.895393000  | 0.110160000  | Re | 0.777642000  | 1.894565000  | 0.122967000  |
